# Supplementary material for: Comprehensive amelioration of high-fat diet-induced metabolic dysfunctions through activation of the PGC-1α pathway by probiotics treatment in mice
Source: PubMed Central journal article supplement (PMC7010303; doi:10.1371/journal.pone.0228932), 2020-02-10
Supplement: pone.0228932.s002.pdf [file pone.0228932.s002.pdf]

\_\_\_\_\_

L PANK

Total AMPK
